# Supplementary material for: Preclinical testing of an anal bulking agent coated with a zwitterionic polymer in a fecal incontinence rat model
Source: Royal Society of Chemistry journal article supplement (doi:10.1039/d1tb02341a), 2022-01-01
Supplement: d1tb02341a1.pdf [file d1tb02341a1.pdf]

## Electronic Supplementary Material

### Preclinical testing of an anal bulking agent coated with a zwitterionic polymer in a fecal incontinence rat model

Jung-Woo Choi,<sup>†a</sup> Joonbum Lee,<sup>†b</sup> Yuseon Lee,<sup>c</sup> Ji-Hun Seo<sup>\*b</sup> and Kwang Dae Hong<sup>\*d</sup>

<sup>a</sup>Department of Pathology, Korea University Ansan Hospital, Gyeonggi-do, Republic of Korea

<sup>b</sup>Department of Materials Science and Engineering, Korea University, Seoul, Republic of Korea

<sup>c</sup>Biomedical Research Center, Korea University Ansan Hospital, Gyeonggi-do, Republic of Korea

<sup>d</sup>Department of Colorectal Surgery, Korea University Ansan Hospital, Gyeonggi-do, Republic of Korea

<sup>†</sup> Contributed equally.

<sup>\*</sup> Correspondence:

Prof. Ji-Hun Seo; E-mail: seojh79@korea.ac.kr; Fax: +82-2-928-3584; Tel: +82-2-3290-3263

Prof. Kwang Dae Hong; E-mail: drhkd@korea.ac.kr; Fax: +82-31-413-4829; Tel: +82-31-412-4922

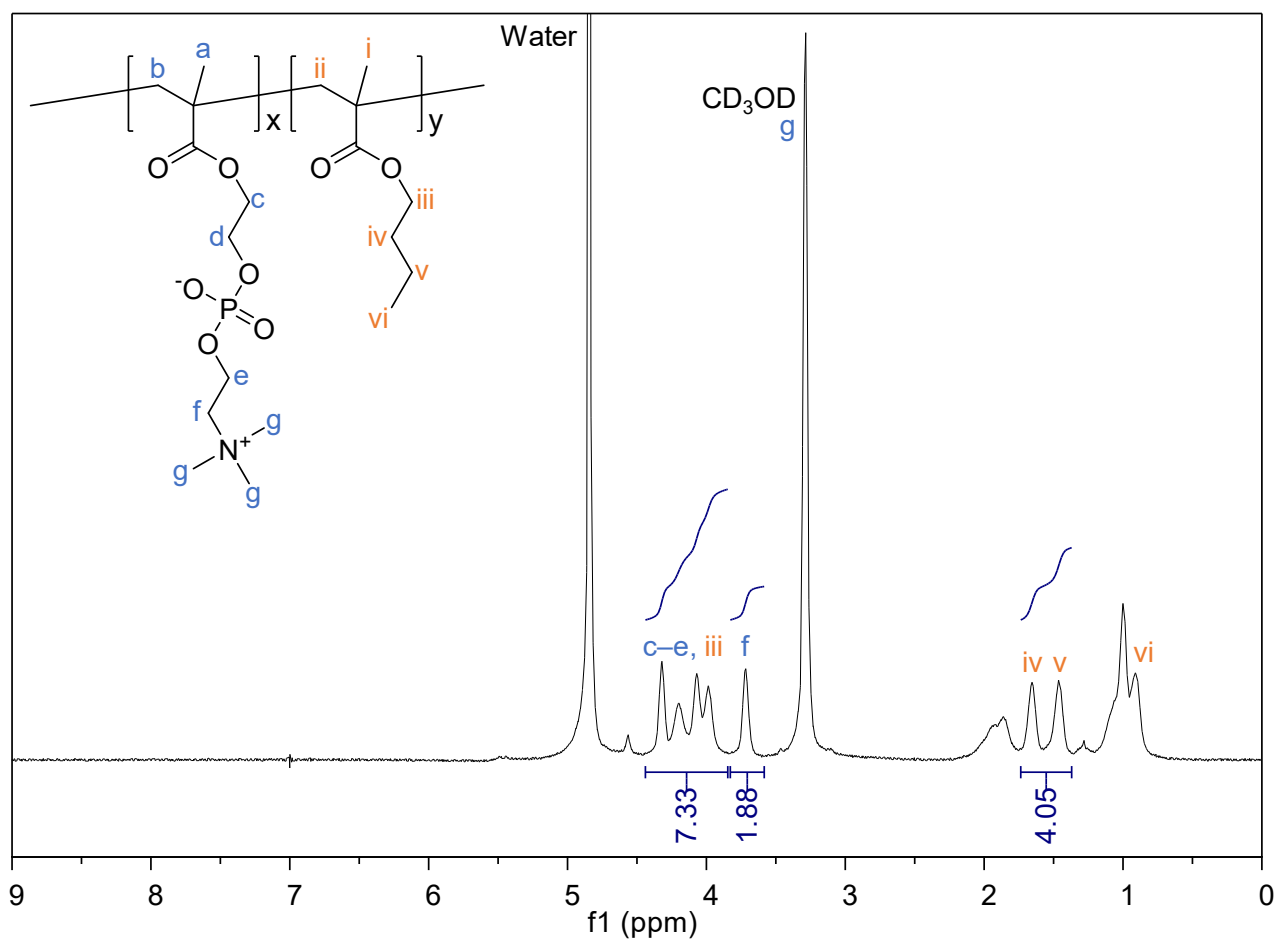

**Figure S1.** <sup>1</sup>H NMR spectrum of the synthesized poly[(2-methacryloyloxyethyl phosphorylcholine)-co-(n-butyl methacrylate)].

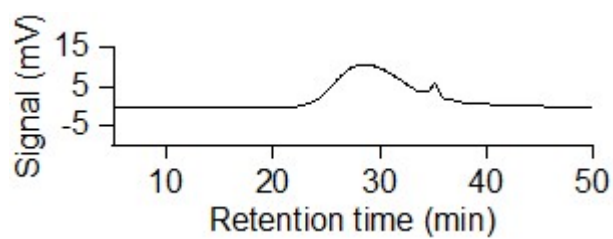

**Figure S2.** Chromatogram, obtained by aqueous gel permeation chromatography, is of the single broad peak of poly[(2-methacryloyloxyethyl phosphorylcholine)-co-(n-butyl methacrylate)].

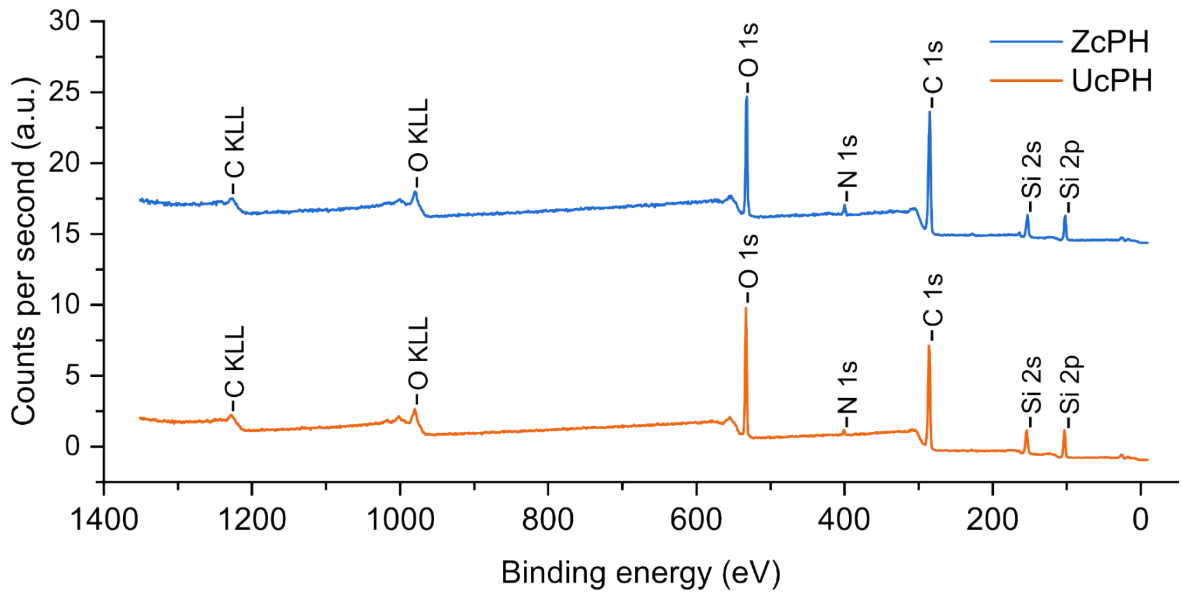

**Figure S3.** Qualitative determination of the overall elemental composition of the bulking agent surfaces. Survey scan spectra of X-ray photoelectron spectroscopy present the major chemical elements. ZcPH, zwitterion coated polydimethylsiloxane hyaluronic acid solution; UcPH, uncoated polydimethylsiloxane hyaluronic acid solution.

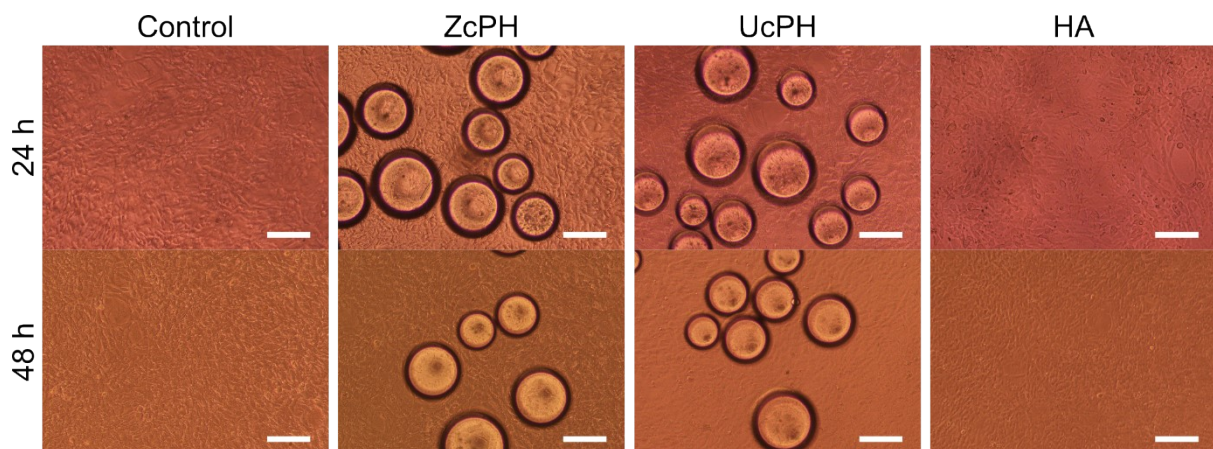

**Figure S4.** Micrographs representing the cellular morphology after the direct contact with the injectable bulking agents for 24 h and 48 h. The cell culture without any foreign material was set as a control. Bar, 100  $\mu\text{m}$ ; ZcPH, zwitterion coated polydimethylsiloxane hyaluronic acid solution; UcPH, uncoated polydimethylsiloxane hyaluronic acid solution; HA, hyaluronic acid solution.

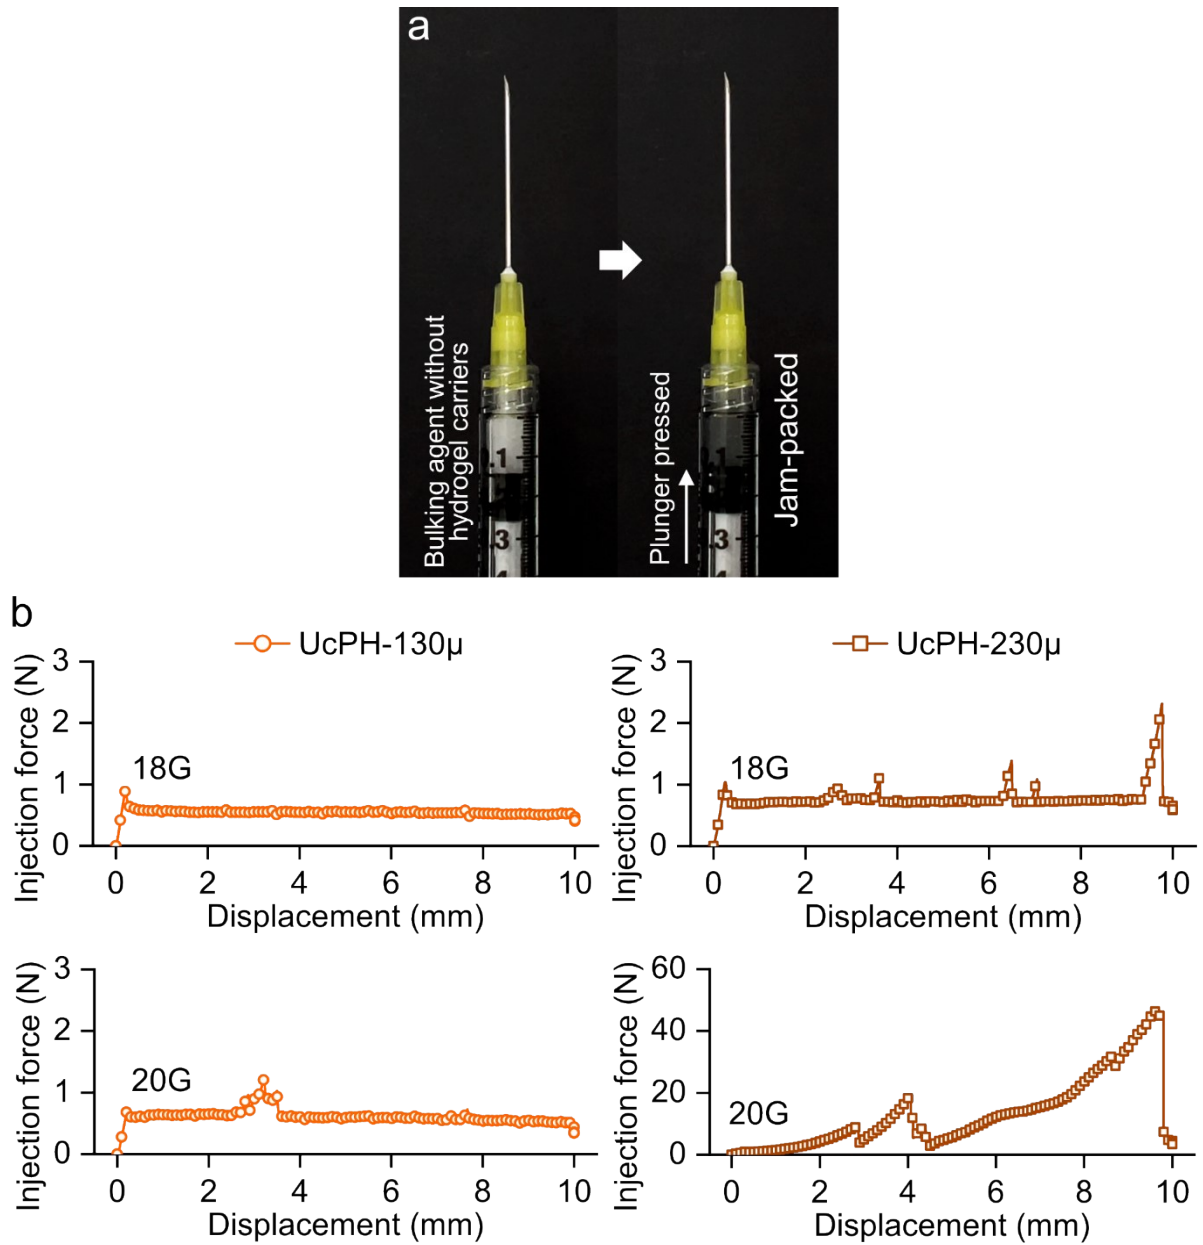

**Figure S5.** Measure of injectabilities of the bulking agents and the effect of particle sizes on injectability of the bulking agents. (a) Non-injectable property of the pure PDMS particles without hydrogel carriers was demonstrated by applying a load to the plunger. (b) Quantification of injection forces for the bulking agents of different particle sizes ( $129 \pm 27 \mu\text{m}$  and  $227 \pm 77 \mu\text{m}$  in diameter, mean  $\pm$  SD). Two different hypodermic needle gauges (18G and 20G) were adopted for the compression test by a materials testing machine. UcPH-130 $\mu$ , uncoated 130-micrometer polydimethylsiloxane hyaluronic acid solution; UcPH-230 $\mu$ , uncoated 230-micrometer polydimethylsiloxane hyaluronic acid solution.
